# Supplementary material
Source: PubMed Central journal article supplement (PMC2613741)
Supplement: pp.108.131367_1.pdf [file pp.108.131367_1.pdf]

Figure S1

**A**

BstYI  
**GATCC** CAATTTTCCTCAATTTGTAGTCGACAATGGCACCTCTTCCAGCACCATACTCAGGAACCA  
 GCACTCTTGCTCTGGTGGCGCGGCATCAGCATTTACCTTTGGACTCGCTTATGGAAGC **GTTAA**  
 MseI

*SlAucsia-1* ATCGGCCGAATTGAGGCGTGTGCGCACATTTGGTTGCAGCTTCCCCGATTCTCGTCATCA  
*SlAucsia-2* -----

*SlAucsia-1* CAAAACTGATATTGACGGGCTGAGTGTGGTGAATTCTAGGGCTTGTAAGGAGATCTAG  
*SlAucsia-2* -----

*SlAucsia-1* CAGCTTCTTTCTCAGATCCCAATT**TTCCTCAATT-TGTAGTCGACAATGGCACCTCTTCC**  
*SlAucsia-2* -----AGAGATCTTGAAGCTCTCTGCTTGTGAAGTCAACA**ATGGCACCTCTTCC**  
 \*\*\*\*\* \* \*\* \*\* \* \* \*\*\*\*\* \*\*\*\*\*

*SlAucsia-1* **AGCACCATACTCAGGAACCAGCACTCTTGCTCTGGTGGCGCGGCATCAGCATTACCTT**  
*SlAucsia-2* **TGGACCTTACTCTGGAACCAGCACCTTCTGCTCTGGTGGCTCGTACTTCAGCCTTACATT**  
 \* \*\*\* \*\*\*\*\* \*\*\*\*\* \* \* \*\*\*\*\* \*\* \*\* \*

*SlAucsia-1* **TGGACTCGCTTATGGAAGCGTTAAGCTCAAGTATCTCAAGGCAAAGGCCAAGTCTCAAAA**  
*SlAucsia-2* **TGGACTTGTCTATGGTAGCATGAAGCTCAAGTATCTCAAGGCTAAAGCCAAGTCTCACCA**  
 \*\*\*\*\* \* \*\*\*\*\* \*\* \* \*\*\*\*\* \*\*\*\*\* \*\* \*\*\*\*\* \*

*SlAucsia-1* **GAAGGCTGAAGCTAAGGCACGTCAC**TGAAAGATATCT-CATGGTGG**ATTGCTCTTTGCT**  
*SlAucsia-2* **GAAAGCTGAAGCTAAGGCACATCAC**TGAAAGAGAGCAGTATGCCGCATTGCTGTCTGTT  
 \*\*\* \*\*\*\*\* \*\*\*\*\* \*\*\*\*\* \* \* \*\*\* \* \*\*\*\*\* \* \*\* \*

*SlAucsia-1* GATAGAATAAGATGTGGCTGATTAAACTGTATCGCGTTTCACCTGATGCTTATAG--GAT  
*SlAucsia-2* AA--AAATAATATATGAC-AATCACATTATATCAGTTTTATTATGGCCCTGTTGCTGAC  
 \* \*\*\*\*\* \*\* \* \* \* \* \* \* \* \* \* \* \*\*\*\*\* \* \* \* \* \*

*SlAucsia-1* AATTAGATTCTGACTTGTAGCTGTTCAATATTTTGGT----AGTTTTGTGGT-TTTTATG  
*SlAucsia-2* CATCAT-TTTCGACTTGTAACTGTTCAATTTTGTGTT**CACGAGTTATTAATGTTTATG**  
 \*\* \* \* \* \*\*\*\*\* \*\*\*\*\* \*\* \* \* \* \* \* \* \* \* \* \* \*\*\*\*\*

*SlAucsia-1* GTTCAGTGGGGTTCTCCACGATCAAATATTATTATATTTATAGTACAAGCCCTCTCA---  
*SlAucsia-2* **GTCCAATGAGTACAATGGTGGTCCAATTTTGGAGATTATATTGGACAAACCGGGGAAAAG**  
 \*\* \*\* \* \* \* \* \* \* \* \* \* \* \* \* \* \* \* \* \* \* \* \* \* \*

*SlAucsia-1* TTAAAATTCAA--ACAACATATGGT-----  
*SlAucsia-2* **TTAGCATTGATCTGCTAGCATAATAATCTTCTTGTTACATCA**  
 \*\*\* \*\* \* \* \* \* \*

**B**

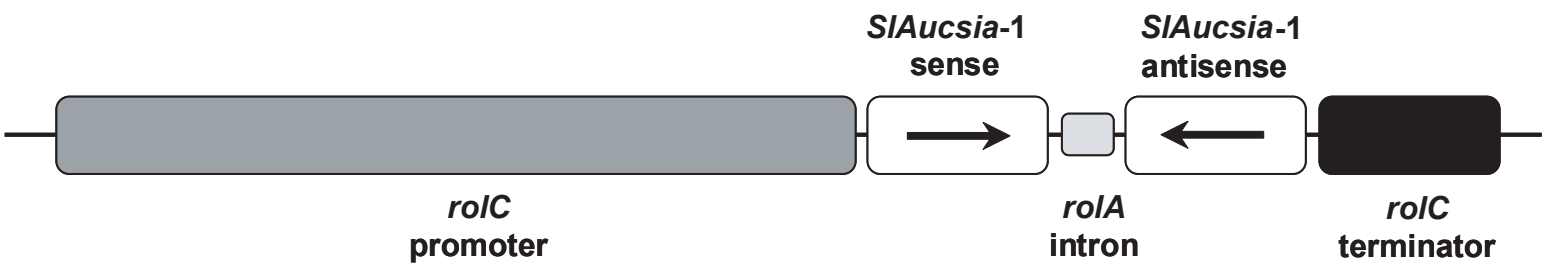

**Figure S1.** Sequence of cDNA-AFLP clone, *SlAucsia-1* and *SlAucsia-2* transcripts and schematic drawing of rolC-hpAucsia construct. A, (Upper) Sequence of differentially-expressed cDNA fragment. Restriction sites are underlined and selective nucleotides used in the primer combination are indicated in green (BstYC-MseC). (Bottom) Alignment of *SlAucsia-1* (AK224828) and *SlAucsia-2* (AK224647) transcripts. The boxed region is the sequence used to design the sense and antisense arms of rolC-hpAucsia construct. DNA fragments corresponding to the sequences shown in red, blue and magenta were used to produce the three RNA probes for siRNA analysis. B, Schematic drawing of rolC-hpAucsia construct.
