# Supplementary material
Source: PubMed Central journal article supplement (PMC2613741)
Supplement: pp.108.131367_2.pdf [file pp.108.131367_2.pdf]

Figure S2

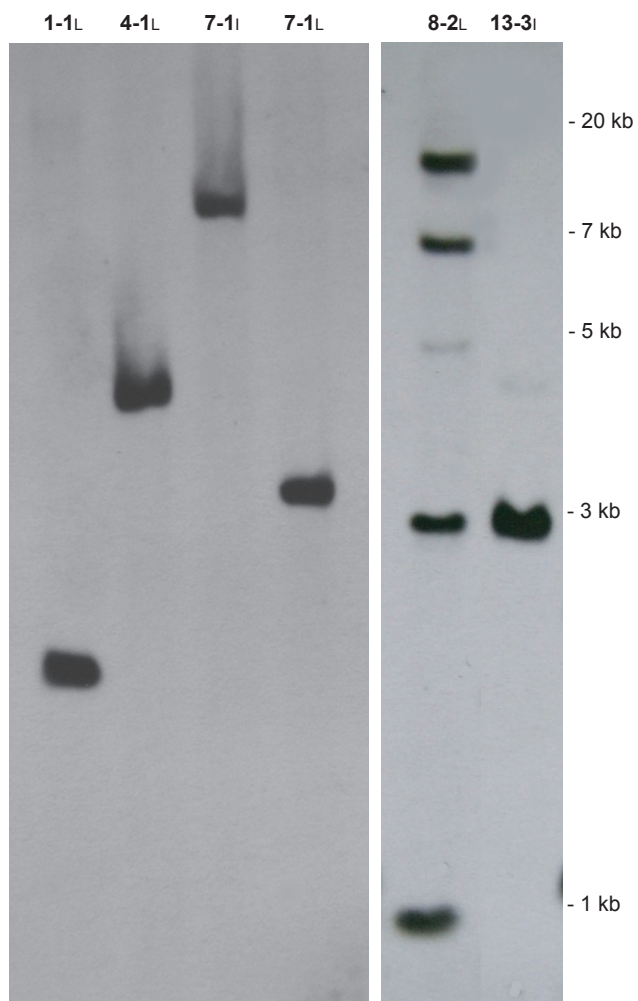

**Figure S2.** Southern blot analysis of T0 tomato plants transgenic for rolC-hpAucsia construct. L and I indicate L276 and INB777 backgrounds, respectively.
