# Supplementary material
Source: PubMed Central journal article supplement (PMC2613741)
Supplement: pp.108.131367_3.pdf [file pp.108.131367_3.pdf]

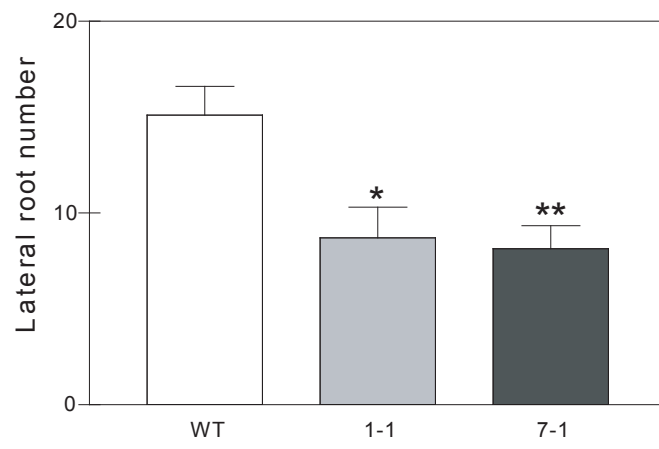

**Figure S3.** Number of lateral roots measured in wild-type and *Aucsia*-silenced lines (L276 1-1 and 7-1). The reported values are means  $\pm$  SD of 10 replicates.
